# Supplementary material
Source: MDPI journal article supplement (https://www.mdpi.com/2075-4701/9/11/1177)
Supplement: s1 [file s1]

## Supplementary Material

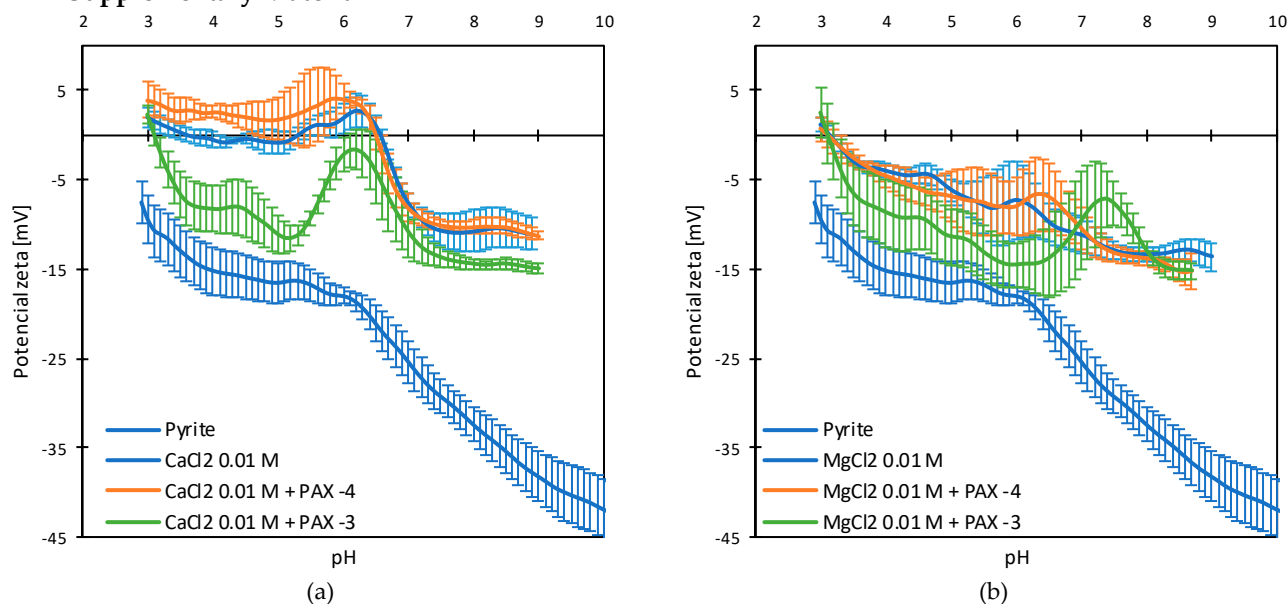

**Figure S1.** Zeta potential of pyrite as function of pH for fresh water (pyrite) without PAX and 0.01 M  $\text{CaCl}_2$  and  $\text{MgCl}_2$  solutions at two concentrations of amyl xanthate (PAX) (a)  $10^{-4}$  M (PAX -4) and (b)  $10^{-3}$  M (PAX -3). Method: Zeta potential of pyrite was evaluated by streaming potential method (Stabino, Microtrac) in titration mode, adjusting the pH along the measurements. Surface and solutions preparation and methodology as shown Paredes et al. [1].

## Reference

1. Paredes, A.; Acuña, S.M.; Gutiérrez, L.; Toledo, P.G. Zeta potential of pyrite particles in concentrated solutions of monovalent seawater electrolytes and amyl xanthate. *Minerals* **2019**, *9*, 584.

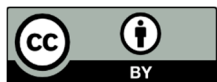

© 2019 by the authors. Submitted for possible open access publication under the terms and conditions of the Creative Commons Attribution (CC BY) license (<http://creativecommons.org/licenses/by/4.0/>).
